# Supplementary material
Source: publisher site journal article supplement (https://www.spandidos-publications.com/7783/downloadSupplementary)

Figure S1. Vascular endothelial growth factor mRNA levels in Caki-2 and Caki/AX cells. Relative target gene level is expressed as  $2^{-\Delta Cq}$ .  $\Delta Cq$  was calculated by subtracting the Cq of the internal standard ( $\beta$ -actin) from that of the target gene. Open ( $\square$ ) and closed ( $\blacksquare$ ) bars indicate the Caki-2 and Caki/AX cells, respectively. Each bar represents the mean  $\pm$  standard deviation (n=4). \*\*P<0.01 (unpaired Student's t-test).

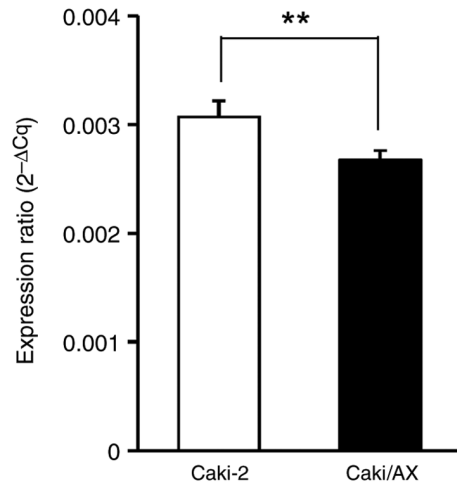

Figure S2. Cadherin 1 mRNA levels in Caki-2 and Caki/AX cells. Relative target gene expression is expressed as  $2^{-\Delta Cq}$ .  $\Delta Cq$  was calculated by subtracting the Cq of the internal standard ( $\beta$ -actin) from that of the target gene. Open ( $\square$ ) and closed ( $\blacksquare$ ) bars indicate the Caki-2 and Caki/AX cells, respectively. Each bar represents the mean  $\pm$  standard deviation (n=4). \*\*P<0.01 (unpaired Student's t-test).

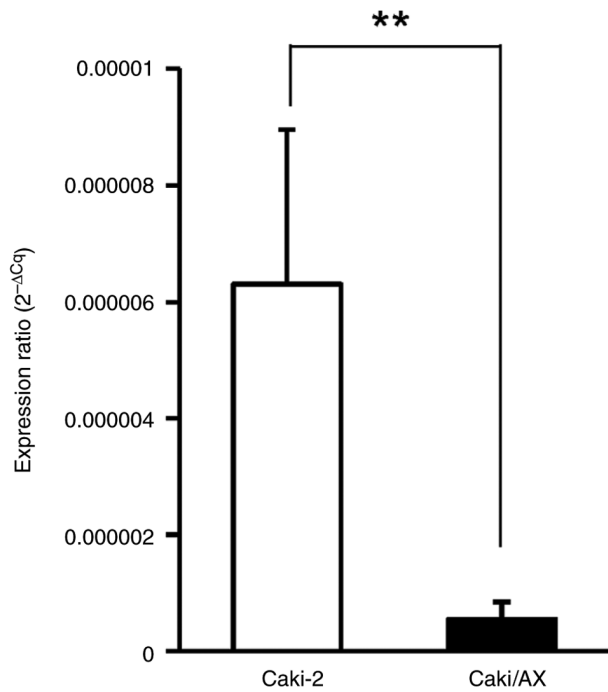

Supplement: Supplementary file 1 [file downloadSupplementary]
